# Supplementary material for: Enhancing Microalgae Content in Biocomposites through a Mechanical Grinding Method
Source: MDPI journal article supplement (doi:10.3390/polym15234557), 2023-11-28
Supplement: s1 [file s1]

## Supporting Information

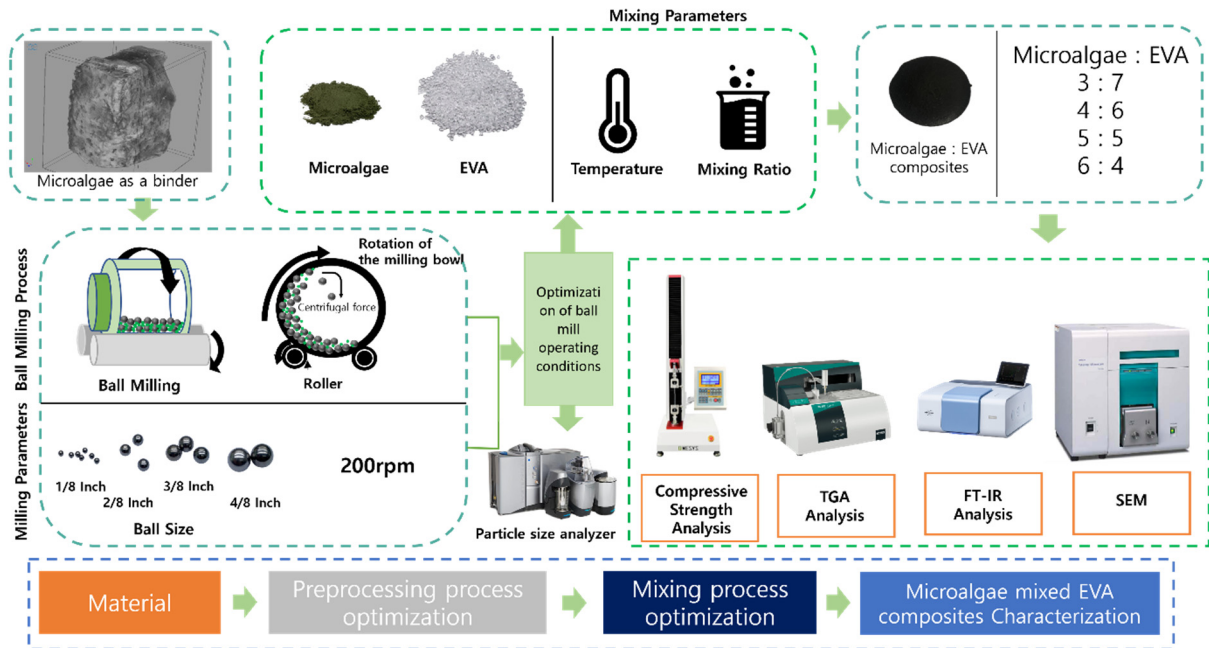

**Figure S1.** Entire Process of the Experiment: Biocomposite Incorporating Microalgae and EVA.

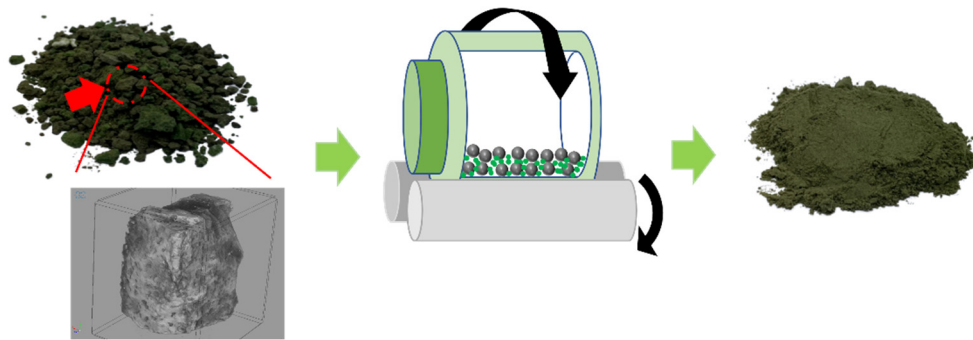

**Figure S2.** Comparison of Chlorella sp. Before and After Ball Milling.

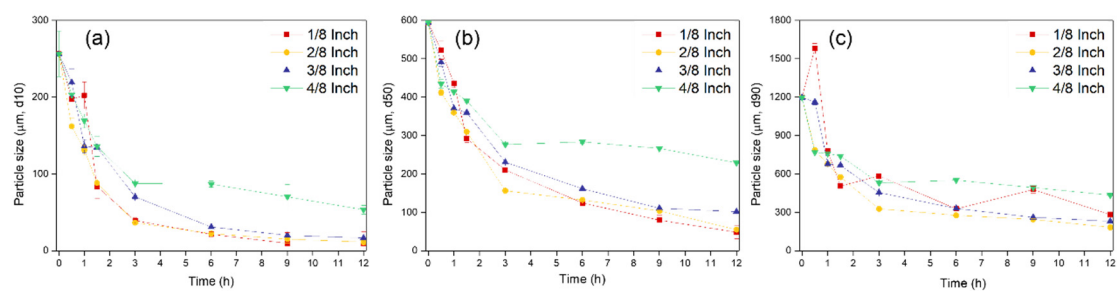

**Figure S3.** Particle Size Distribution Curves. Fig. S3a represents d10, Fig. S3b represents d50, and Fig. S3c represents d90.
